# Supplementary material for: Trimethoprim: An Old Antibacterial Drug as a Template to Search for New Targets. Synthesis, Biological Activity and Molecular Modeling Study of Novel Trimethoprim Analogs
Source: PubMed Central journal article supplement (PMC6983048; doi:10.3390/molecules25010116), 2019-12-27
Supplement: molecules-25-00116-s001.pdf [file molecules-25-00116-s001.pdf]

## Supplementary informations

### **Trimethoprim: An Old Antibacterial Drug As A Template To Search for New Targets. Synthesis, Biological Activity and Molecular Modeling Study of Novel Trimethoprim Analogues.**

*Agnieszka Wróbel<sup>a\*</sup>, Dawid Maliszewski<sup>a</sup>, Maciej Baradyn<sup>b</sup> and Danuta Drozdowska<sup>a</sup>*

*<sup>a</sup>Department of Organic Chemistry, Medical University of Białystok, Poland;*

*<sup>b</sup>Department of Theoretical Chemistry, Institute of Chemistry, University of Białystok, Poland*

*\*Please address all correspondence to: Department of Organic Chemistry, Medical University, Mickiewicza 2A Str., 15-222 Białystok, Poland; e-mail: agnieszkawrobel9@gmail.com.*

# Compound 1

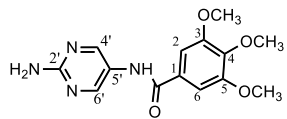

## $^1\text{H}$ NMR

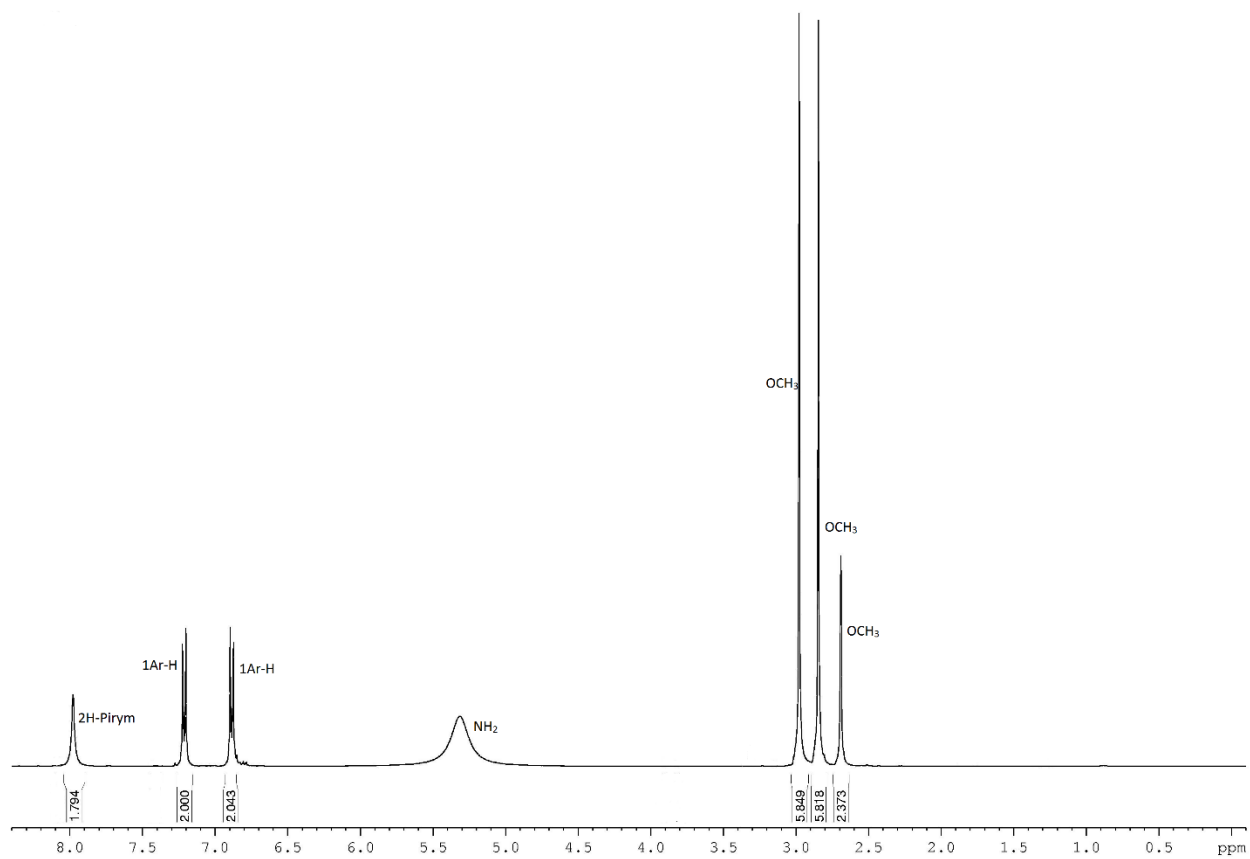

## $^{13}\text{C}$ NMR

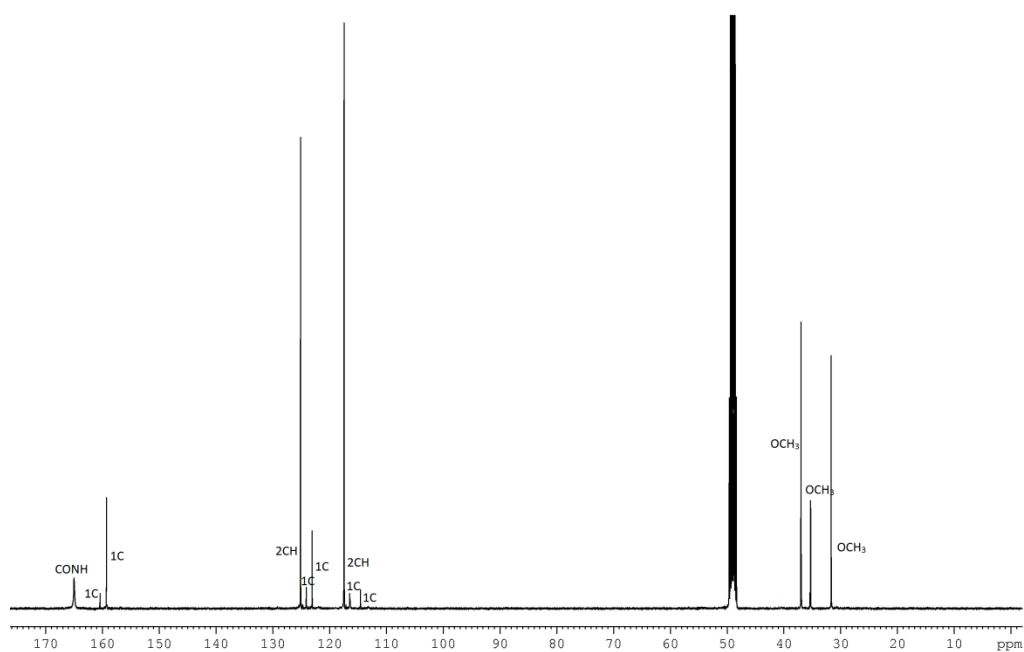

## Compound 2

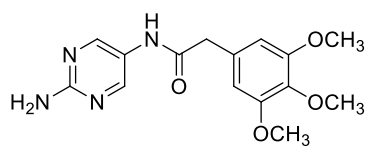

## <sup>1</sup>H NMR

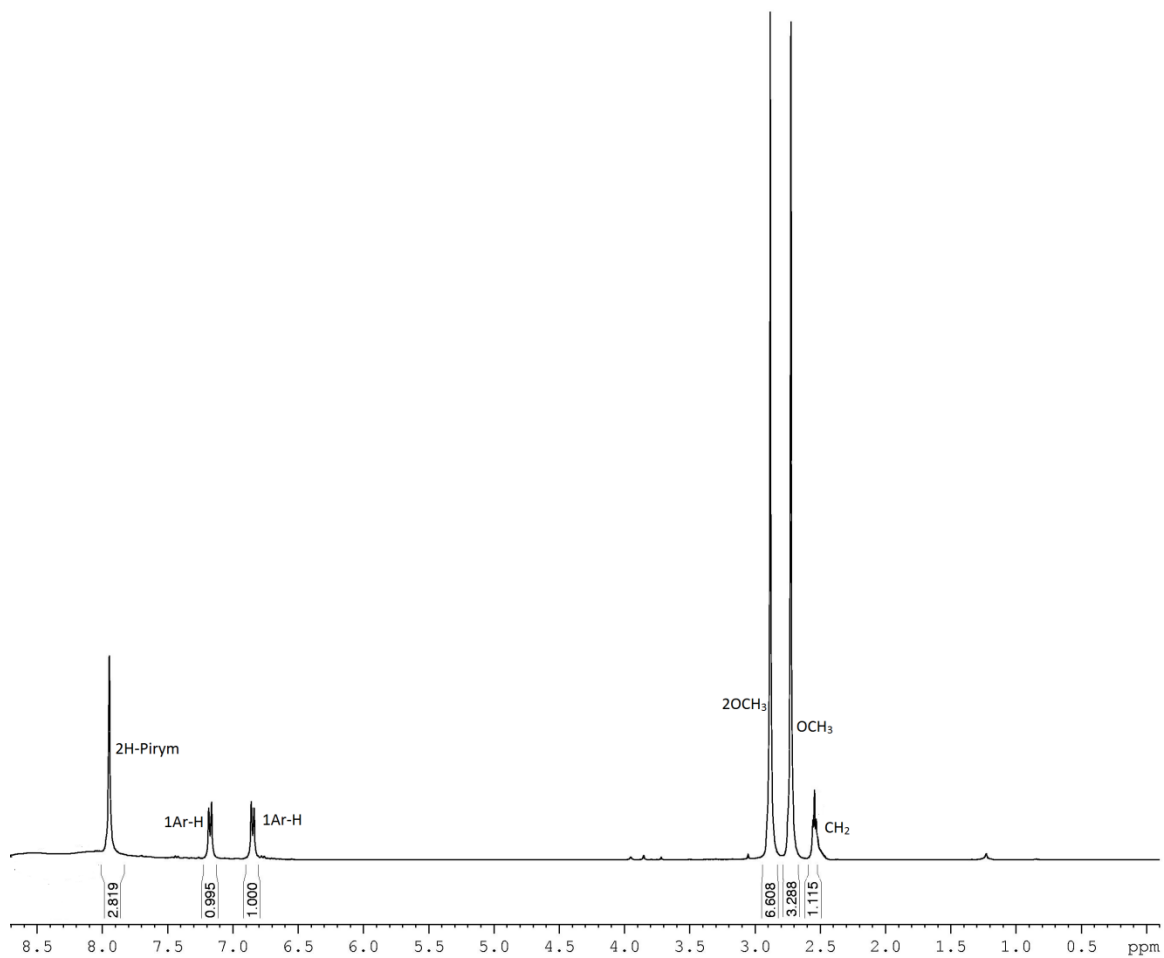

## <sup>13</sup>C NMR

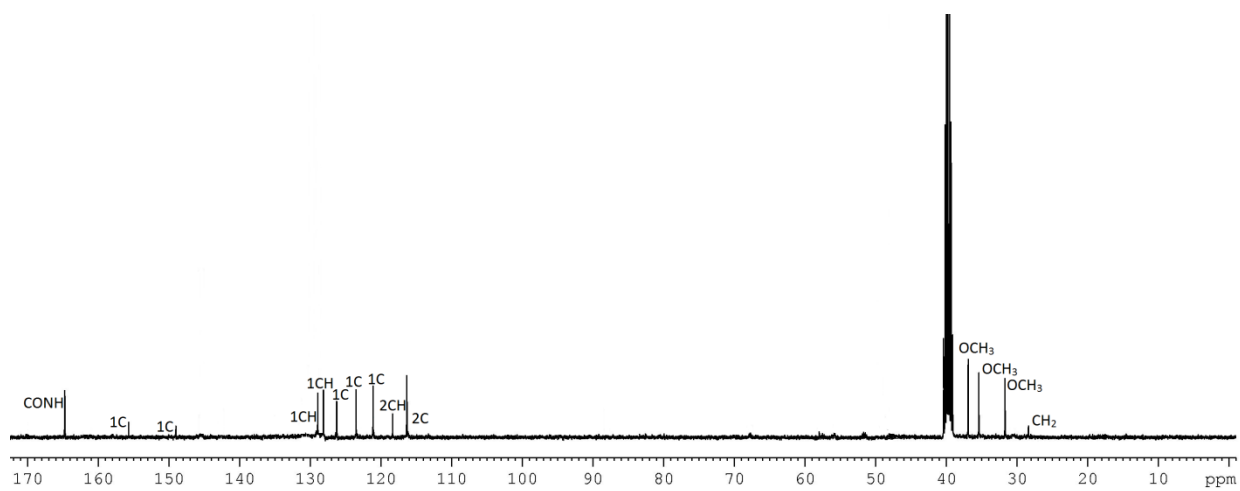

### Compound 3

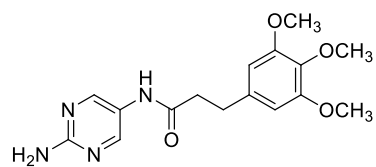

### $^1\text{H}$ NMR

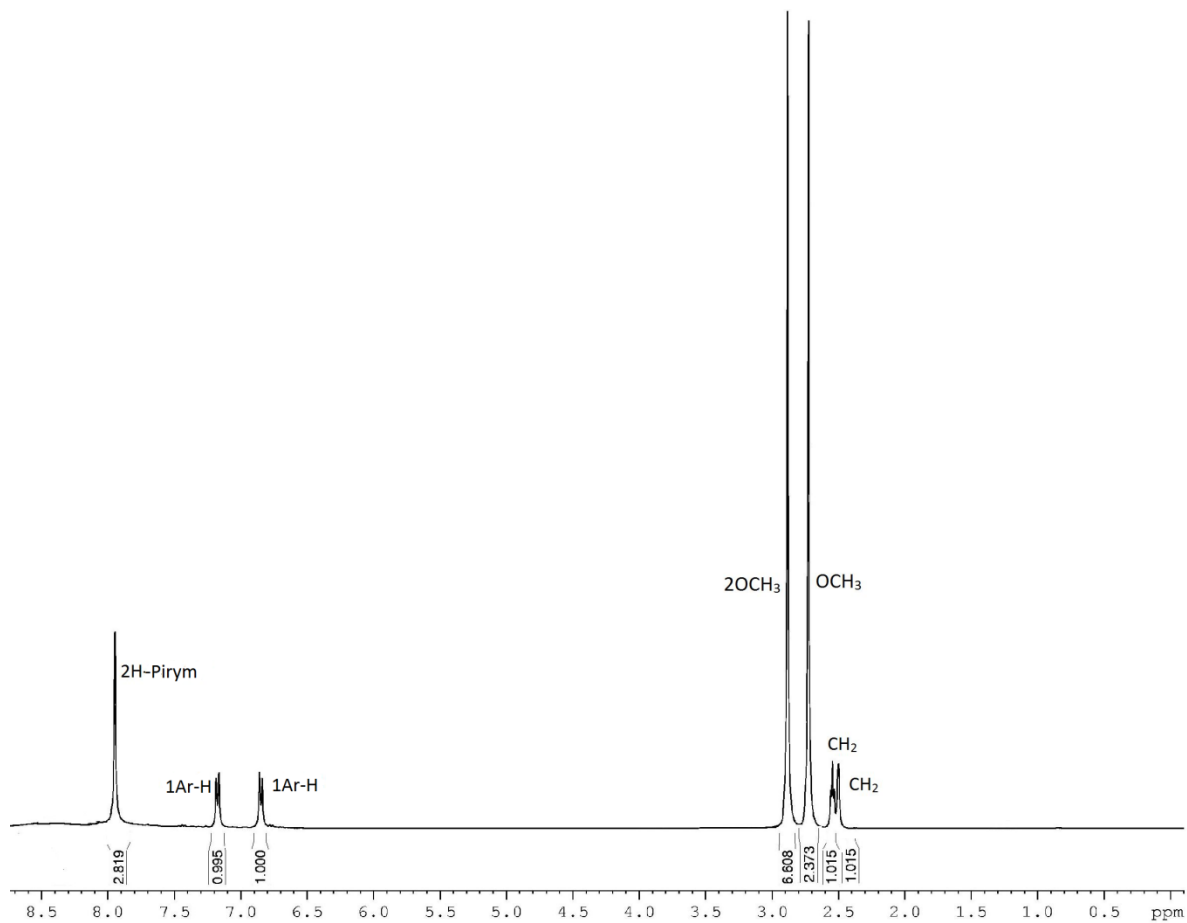

### $^{13}\text{C}$ NMR

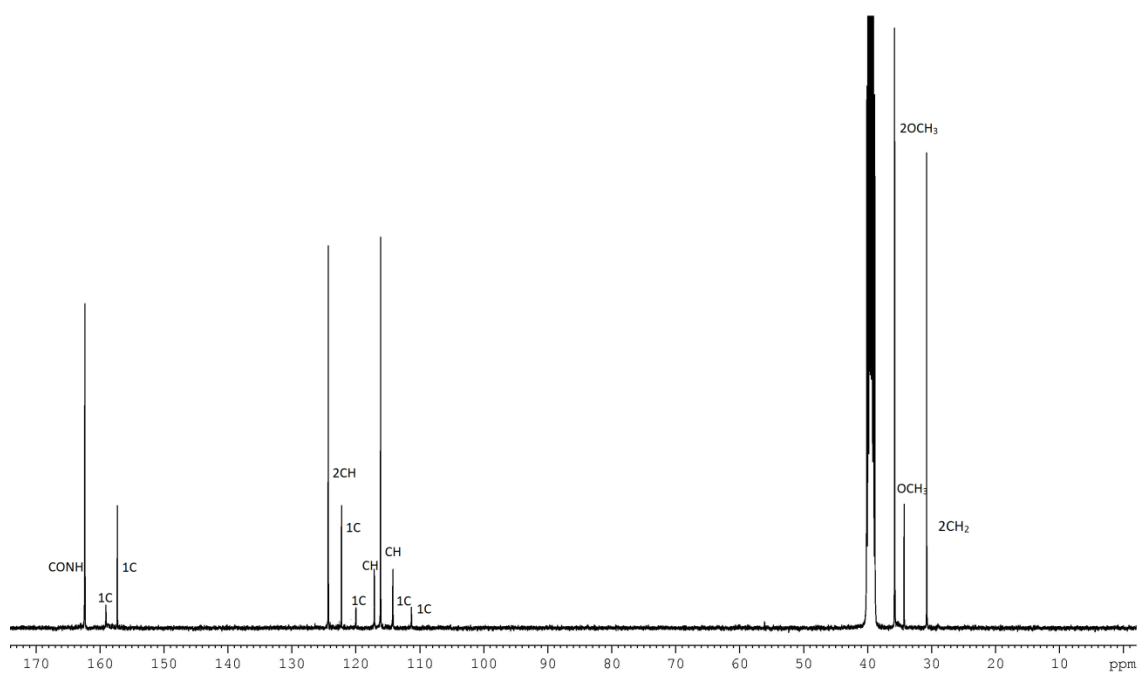

## Compound 4

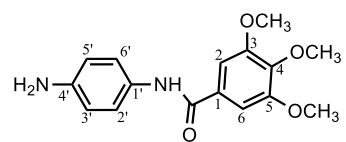

### $^1\text{H NMR}$ ( $\text{CDCl}_3$ )

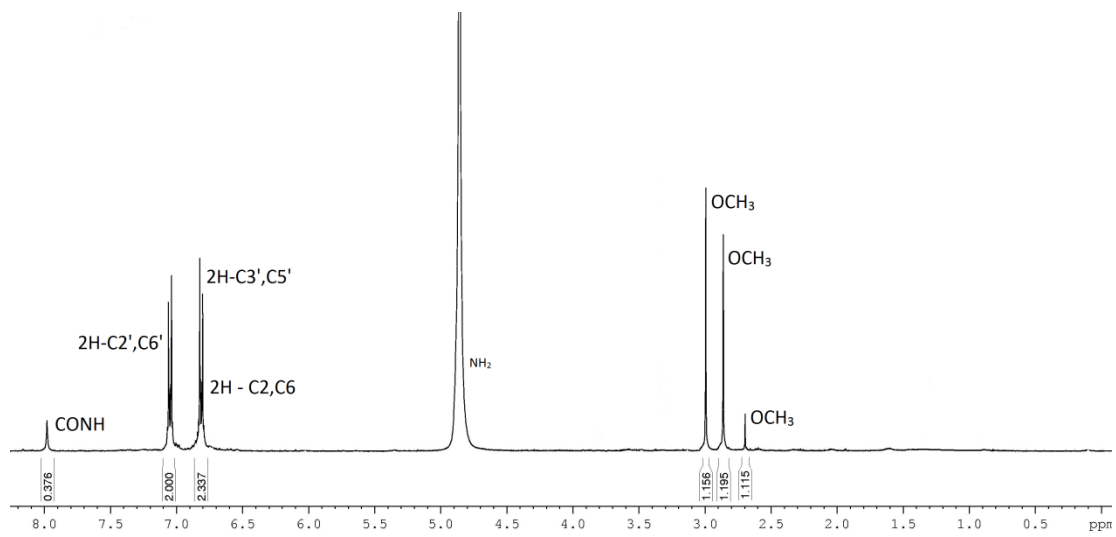

### $^{13}\text{C NMR}$ NH<sub>2</sub>

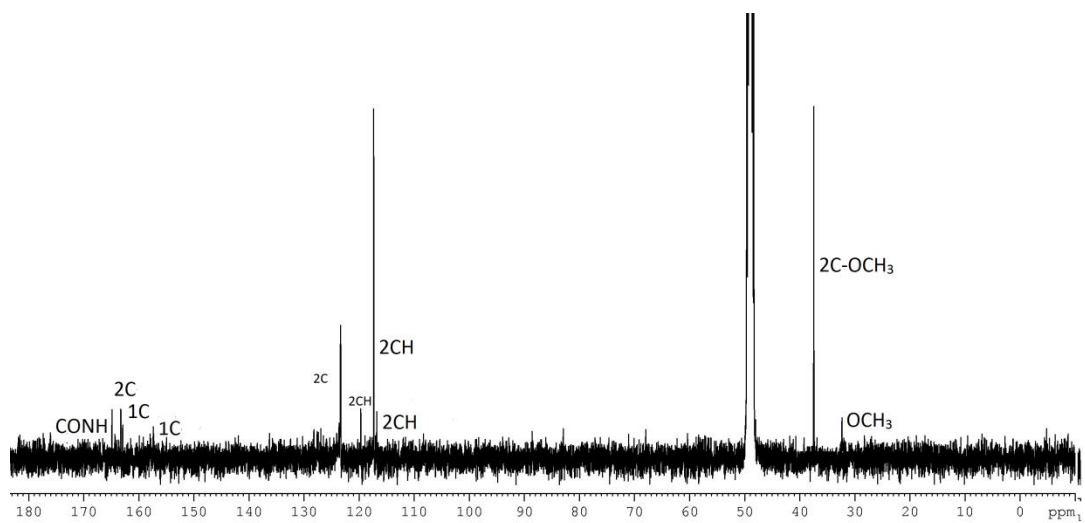

# Compound 5

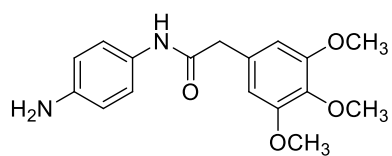

## <sup>1</sup>H NMR

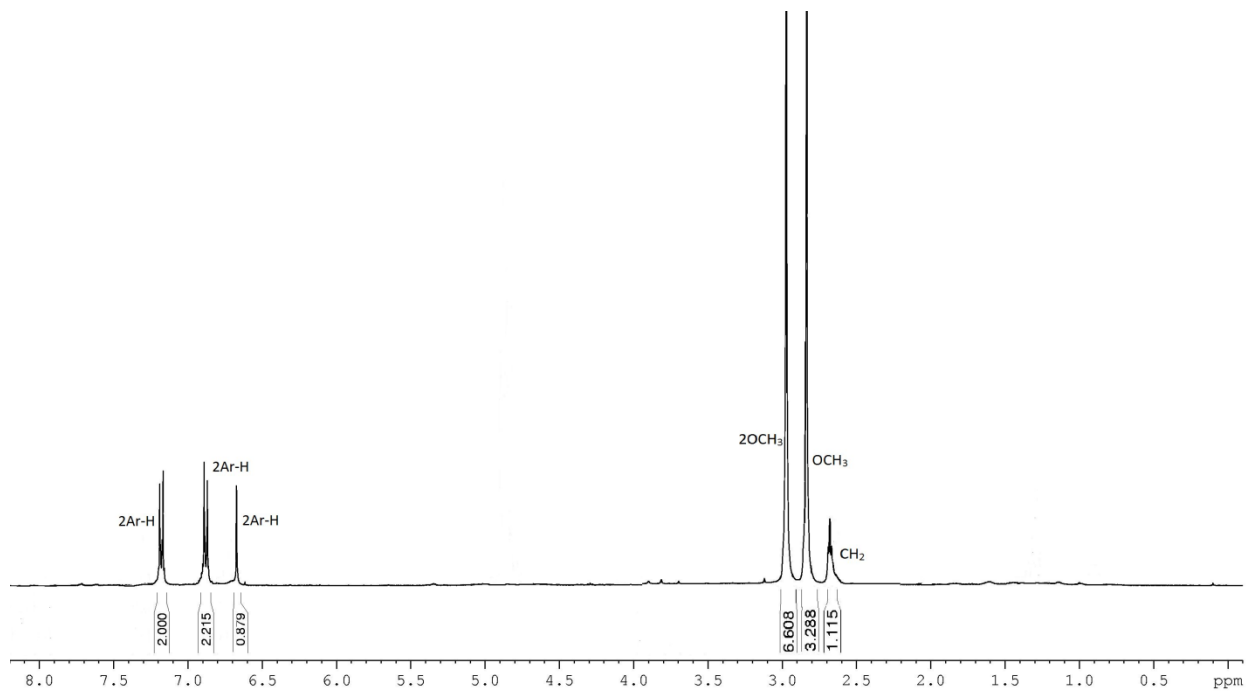

## <sup>13</sup>C NMR

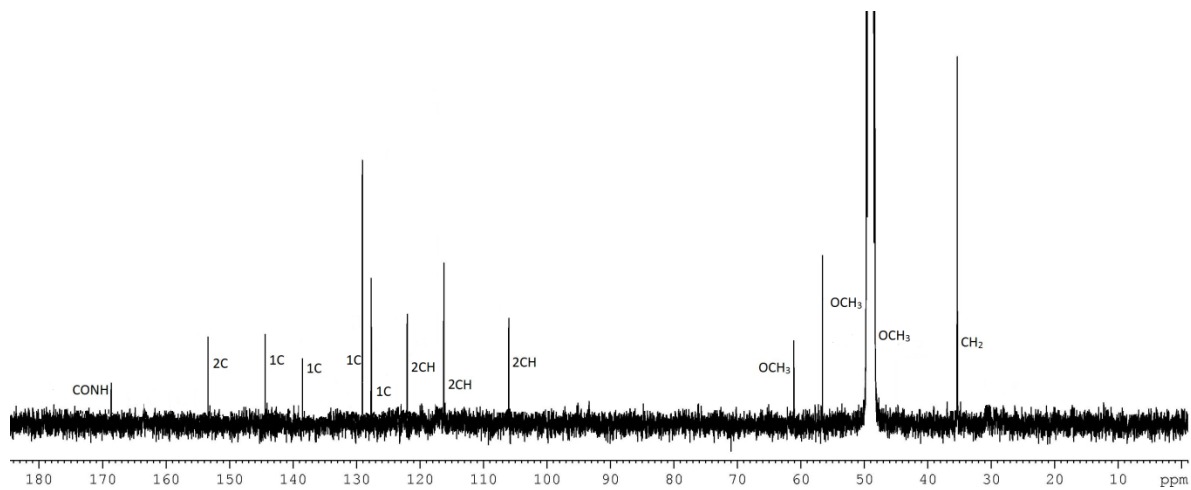

# Compound 6

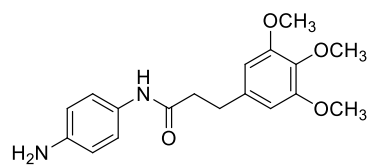

## <sup>1</sup>H NMR

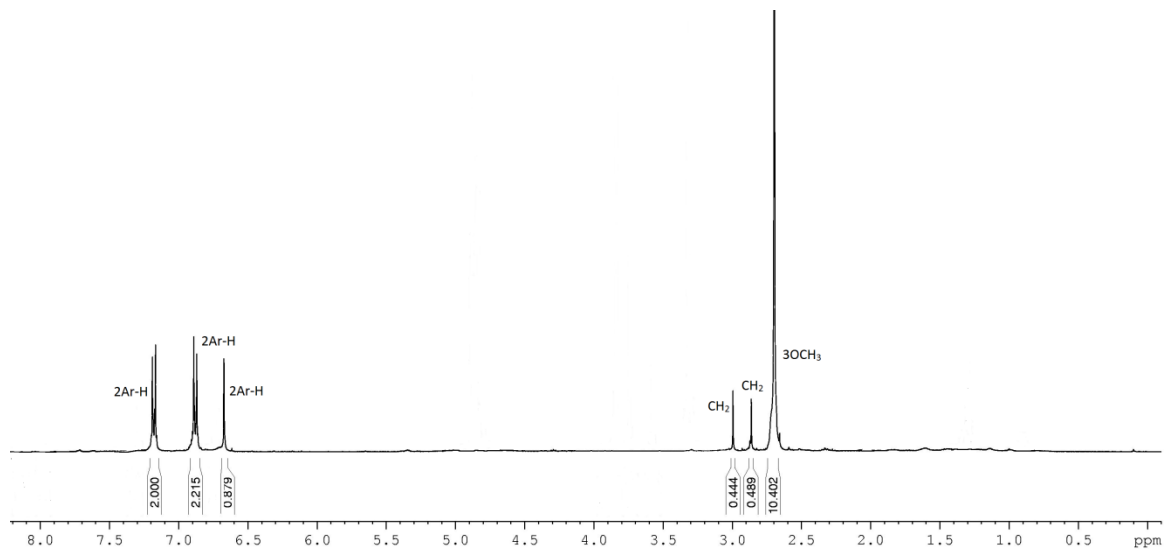

## <sup>13</sup>C NMR

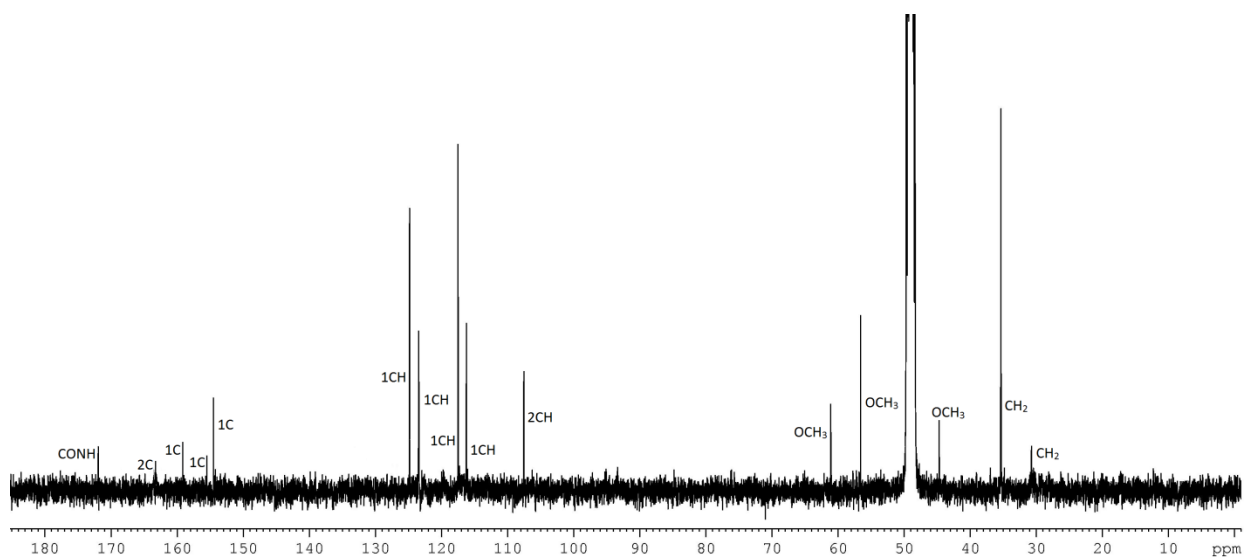

**Table S1.** List of binding modes of the molecule 2 from this study, as well as RMSD values relative to the best binding mode. Mode 3 is analogous to the binding mode of compound 1 but shows significantly smaller affinity than mode 1 (reversed structure).

| mode | affinity<br>(kcal/mol) | dist from best mode |           |
|------|------------------------|---------------------|-----------|
|      |                        | rmsd l.b.           | rmsd u.b. |
| 1    | -8.3                   | 0.000               | 0.000     |
| 2    | -8.0                   | 1.162               | 2.262     |
| 3    | -7.4                   | 4.123               | 8.238     |
| 4    | -7.3                   | 2.794               | 4.136     |
| 5    | -7.3                   | 3.938               | 7.833     |
| 6    | -7.3                   | 1.983               | 3.411     |
| 7    | -7.2                   | 1.548               | 1.642     |
| 8    | -7.2                   | 2.752               | 3.652     |
| 9    | -7.2                   | 4.258               | 7.744     |

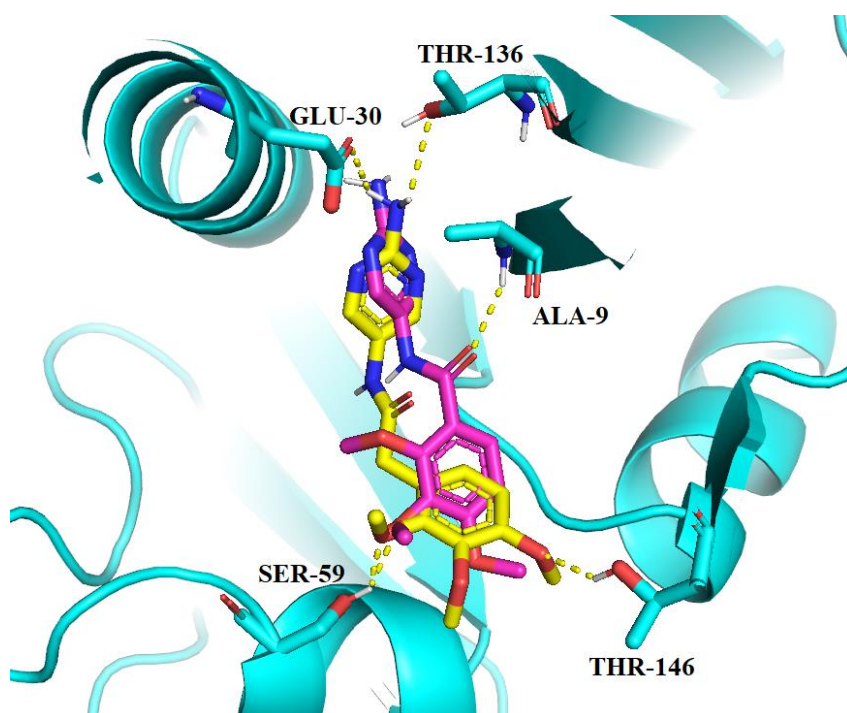

Figure S1. Binding mode comparison of molecule 1 (pink, -7.7 kcal/mol) and mode 3 of molecule 2 (yellow, -7.4 kcal/mol).
